# Supplementary material for: Toronto Workshop on Late Recurrence in Estrogen Receptor–Positive Breast Cancer: Part 1: Late Recurrence: Current Understanding, Clinical Considerations
Source: PubMed Central journal article supplement — JNCI Cancer Spectr. 2019 Aug 10;3(4):pkz050. doi: 10.1093/jncics/pkz050 (PMC7049988; doi:10.1093/jncics/pkz050), 2019-08-10
Supplement: pkz050_supplementary_data.pdf [file pkz050_supplementary_data.pdf]

## **Appendix 1**

### **List of attendees to the Toronto workshop on late recurrence in estrogen receptor positive breast cancer, February 2018.**

Ryan J.O. Dowling  
Joseph A. Sparano  
Pamela J. Goodwin  
Fabrice Andre  
Francois-Clement Bidard  
Ann-Kathrin Bittner  
David W. Cescon  
Sarat Chandarlapaty  
Joseph O. Deasy  
Mitch Dowsett  
Robert J. Gray  
N. Lynn Henry  
Funda Meric-Bernstam  
Jane Perlmutter  
George W. Sledge  
Max Wicha  
Mangesh A. Thorat  
Scott V. Bratman  
Lisa A. Carey  
Martin C. Chang  
Angela DeMichele  
Marguerite Ennis  
Katarzyna J. Jerzak  
Larissa A. Korde  
Ana Elisa Lohmann  
Eleftherios P. Mamounas  
Wendy R. Parulekar  
Meredith M. Regan  
Daniel Schramek  
Vuk Stambolic  
Timothy J. Whelan  
Antonio C. Wolff  
Jim R. Woodgett  
Kevin Kalinsky  
Daniel F. Hayes  
Anna Babayan  
Margaret Flowers
